# Supplementary material for: Highly selective and sensitive fluorescent sensing of oxalate in water
Source: Royal Society of Chemistry journal article supplement (doi:10.1039/c2cc33191h), 2012-01-01
Supplement: c2cc33191h.pdf [file c2cc33191h.pdf]

## Supplementary Information for

# Highly Selective and Sensitive Fluorescent Sensing of Oxalate in Water

Min Hu, Guoqiang Feng\*

Key Laboratory of Pesticide and Chemical Biology of Ministry of Education, College of Chemistry,  
Central China Normal University, Wuhan 430079, P.R. China,  
gf256@mail.ccnu.edu.cn

### 1. General Experimental Details.

Starting materials were purchased from commercial suppliers and were used without further purification. All solvents were purified by the most used methods before use. N-(2-hydroxyethyl)piperazine-N'-(2-ethane-sulfonic acid) (HEPES) was used to prepare buffer solution and all solutions were prepared with using distilled water that had been passed through a Millipore-Q ultrapurification system. UV-vis spectra and fluorescent spectra were recorded on an Agilent Cary 100 UV-vis spectrophotometer and an Agilent Cary Eclipse fluorescence spectrophotometer, respectively.

### 2. Synthesis of $\text{Cu}_2\text{L}$

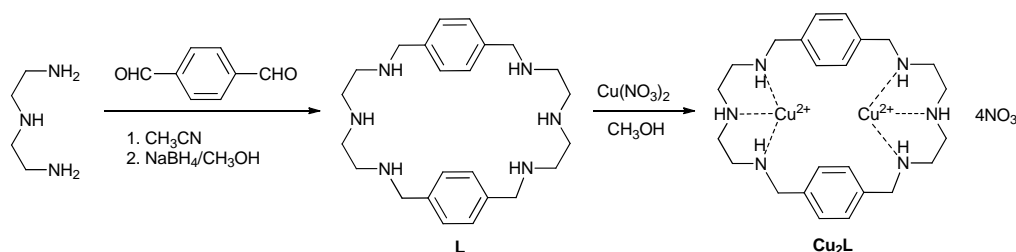

The macrocycle ligand **L** can be prepared very easily by [2+2] condensation of terephthalaldehyde with diethylenetriamine followed by reduction using  $\text{NaBH}_4$  (above scheme).<sup>1</sup> The copper complex **Cu<sub>2</sub>L** was prepared according to the procedure published by Fabbrizzi *et al*<sup>2</sup> and was recrystallized from  $\text{MeOH}/\text{H}_2\text{O}$  (v/v, 9:1) to afford the pure compound. Yield: 76%. Elemental analysis calcd for  $\text{C}_{24}\text{H}_{38}\text{N}_6\text{Cu}_2 \cdot (\text{NO}_3)_4 \cdot \text{H}_2\text{O}$ : C 35.87, H 5.02, N 17.43; found: C 35.93, H 5.32, N 17.11.

#### References:

1. Chen, D.; Martell, A. E. *Tetrahedron* **1991**, *47*, 6895.
2. Fabbrizzi, L.; Marcotte, N.; Stomeo, F.; Taglietti, A. *Angew. Chem. Int. Ed.* **2002**, *41*, 3811-3824.

### 3. Job's plot examined for $\text{Cu}_2\text{L}$ with fluorescein and Eosin Y

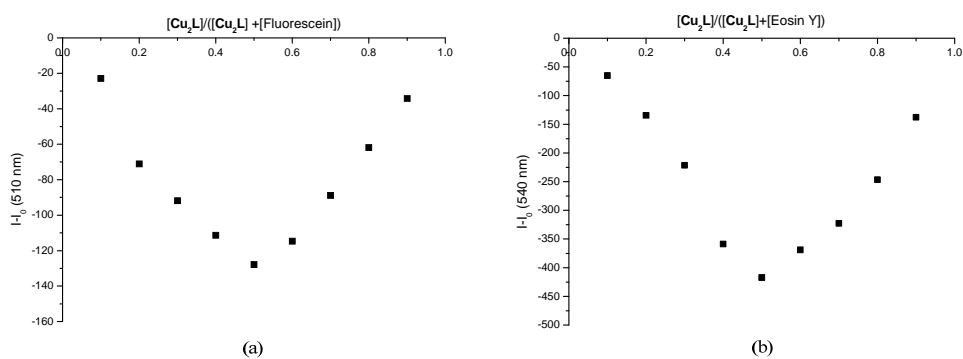

**Figure S1.** Job's plot examined between  $\text{Cu}_2\text{L}$  with indicator fluorescein (a) and Eosin Y (b).  $[\text{Cu}_2\text{L}] + [\text{indicator}] = 10 \mu\text{M}$ . All the spectra were measured in pure aqueous solution of 10 mM HEPES buffer (pH 7.0) at 25°C.

### 4. UV studies of ensemble 1 on sensing oxalate over other anions

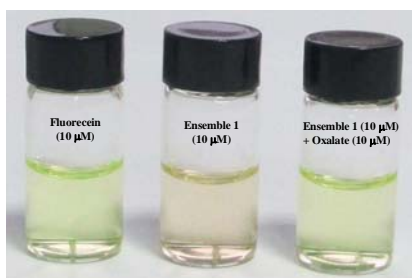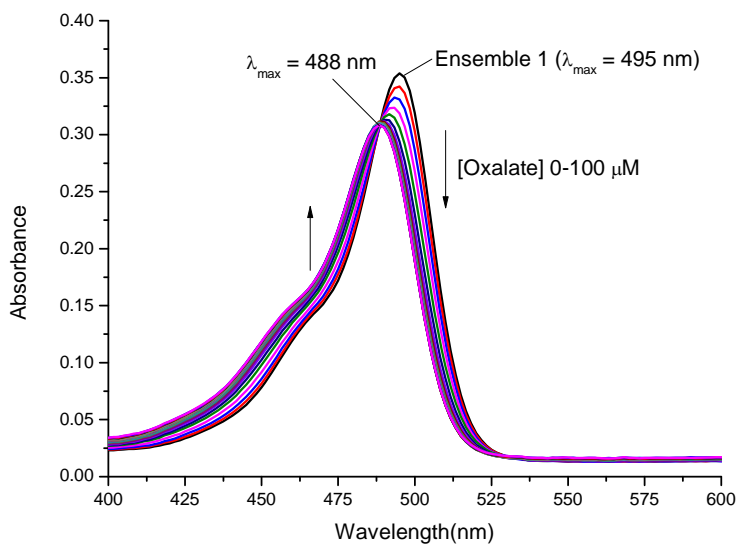

(a)

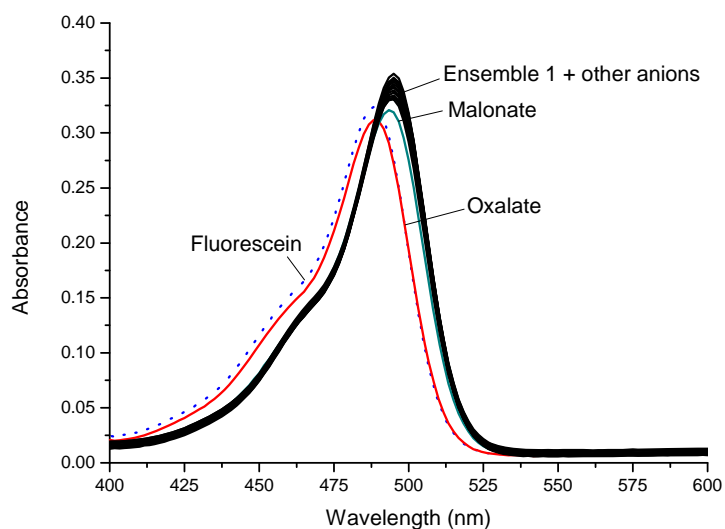

(b)

**Figure S2.** (a) UV-vis spectra changes of ensemble **1** ( $10 \mu\text{M}$ ) upon addition 0-10 equiv of oxalate (Sodium salt) in pure aqueous solution of 10 mM HEPES buffer (pH 7.0) at  $25^\circ\text{C}$ . (b) UV-vis spectra changes of ensemble **1** ( $10 \mu\text{M}$ ) in the presence of various anions ( $10 \mu\text{M}$ ) (Sodium salt). Dashed line is the UV-vis spectra of fluorescein ( $10 \mu\text{M}$ ). All spectra are measured in pure aqueous solution of 10 mM HEPES buffer (pH 7.0) at  $25^\circ\text{C}$ .

### 5. UV studies of ensemble **2** on sensing oxalate over other anions

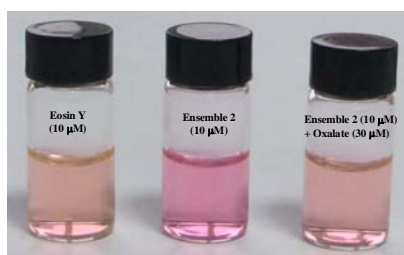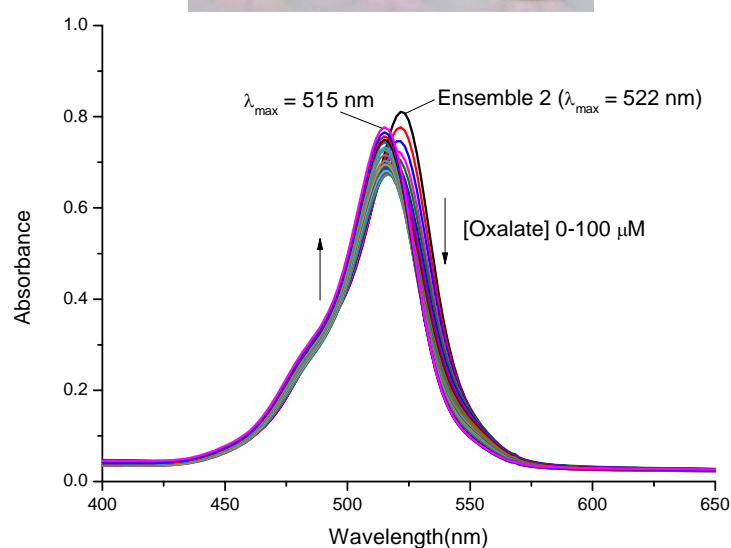

(a)

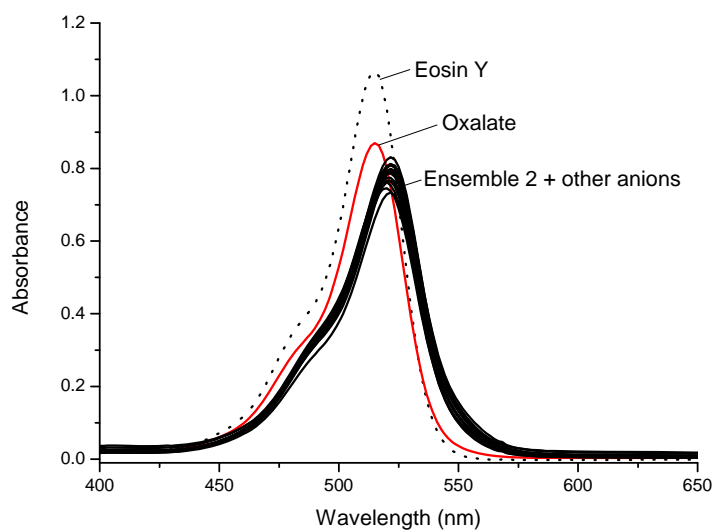

(b)

**Figure S3.** (a) UV-vis spectra changes of ensemble 2 (10 μM) upon addition 0-10 equiv of oxalate (Sodium salt). (b) UV-vis spectra changes of ensemble 2 (10 μM) in the presence of various anions (30 μM) (Sodium salt). Dashed line is the UV-vis spectra of Eosin Y (10 μM). All spectra are measured in pure aqueous solution of 10 mM HEPES buffer (pH 7.0) at 25°C.

## 6. Comparison of fluorescent sensing oxalate with other anions using ensemble 1 and 2

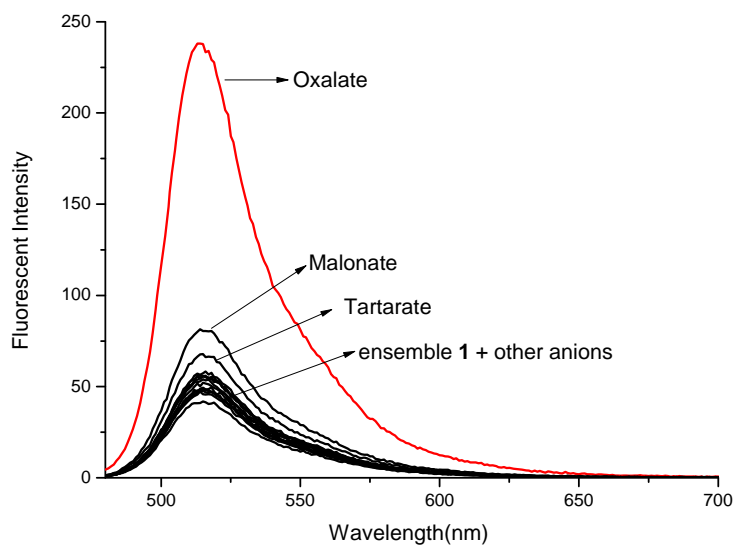

(a)

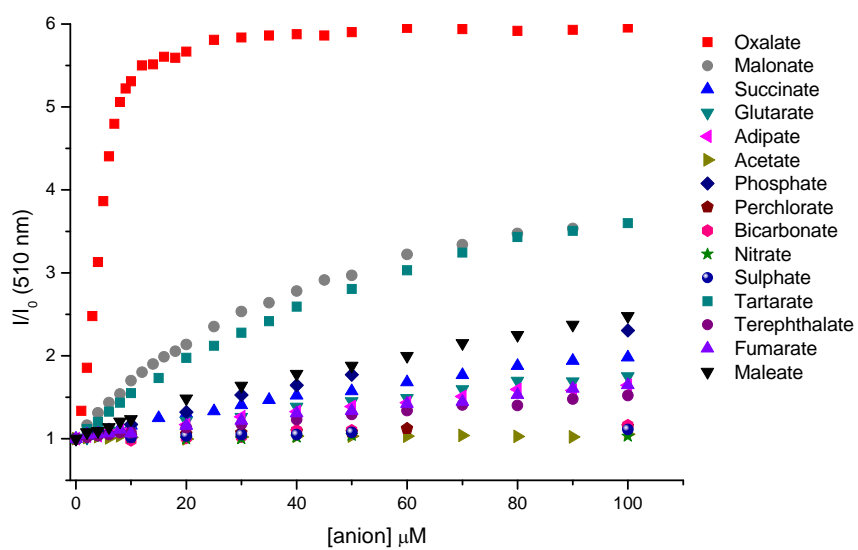

(b)

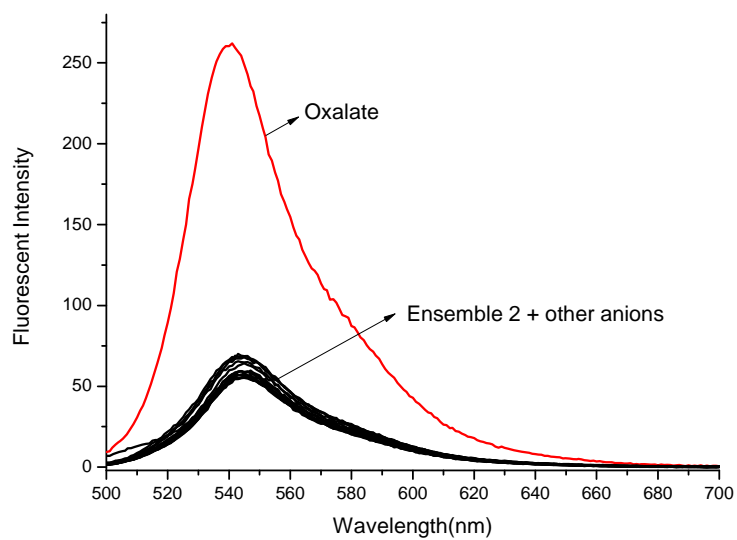

(c)

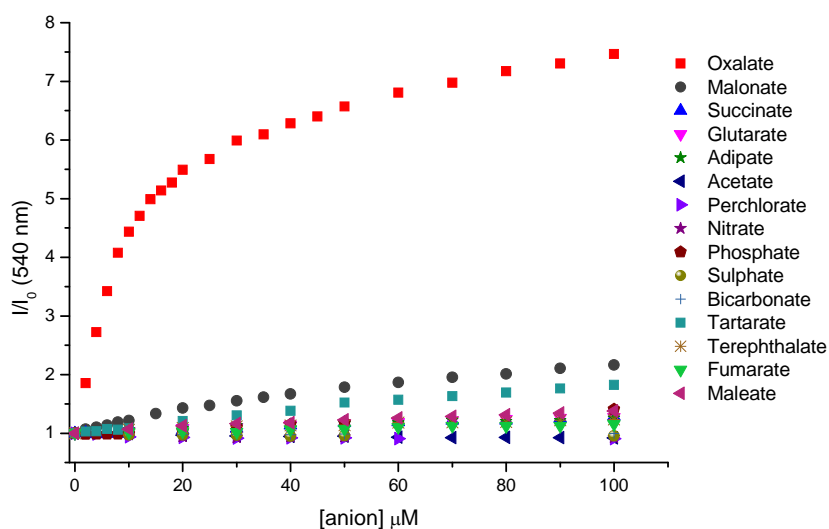

(d)

**Figure S4.** (a) Fluorescence spectra changes of ensemble 1 (10 μM) upon addition of different anions (1 equiv). (b) A plot of relative fluorescence intensity of ensemble 1 at 510 nm ( $I/I_0$ ) vs concentrations for different anions. (c) Fluorescence spectra changes of ensemble 2 (10 μM) upon addition of different anions (1 equiv). (d) A plot of relative fluorescence intensity of ensemble 2 at 540 nm ( $I/I_0$ ) vs concentrations for different anions.  $I_0$  is the fluorescence intensity of ensemble,  $I$  is the fluorescence intensity of ensemble after addition of anions.  $\lambda_{ex}$  for ensemble 1 is 470 nm.  $\lambda_{ex}$  for ensemble 2 is 490 nm. All spectra are measured in pure aqueous solution of 10 mM HEPES buffer (pH 7.0) at 25 °C.

## 7. Determination of the apparent association constants ( $K_a$ ) for oxalate anion with $Cu_2L$

H is the host (metal complex here), I is the indicator, G is the guest (anions).  
 H with I (and G) forms 1:1 binding complex:

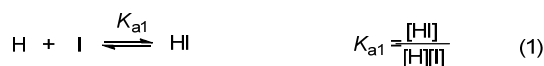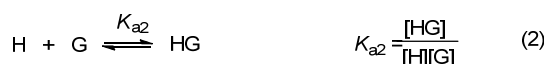

For indicator displacement approach:

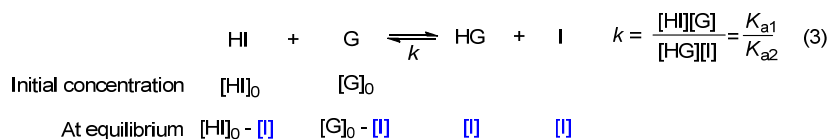

$$\text{From } k [I]^2 = ([HI]_0 - [I])([G]_0 - [I]) = [I]^2 - ([HI]_0 + [G]_0)[I] + [HI]_0[G]_0$$

We can get the concentration of I:

$$[I] = \frac{[HI]_0 + [G]_0 - \sqrt{([HI]_0 + [G]_0)^2 - 4(1 - k)[HI]_0[G]_0}}{2(1 - k)} \quad (4)$$

$$\text{The concentration of HI: } [HI] = [HI]_0 - [I] \quad (5)$$

The observed fluorescent intensity is the sum of the fluorescent intensity of free HI and I:

$$F_{obs} = F_{HI} + F_I \quad (6)$$

Equations (4), (5) and (6) are used for a nonlinear fitting the titration data, then  $k$  is obtained.

$K_{a1}$  is obtained from the titration experiments of the indicator with metal complex.

Now we have  $K_{a1}$  and  $k$ , then we can get the value of  $K_{a2}$  from equation (3).

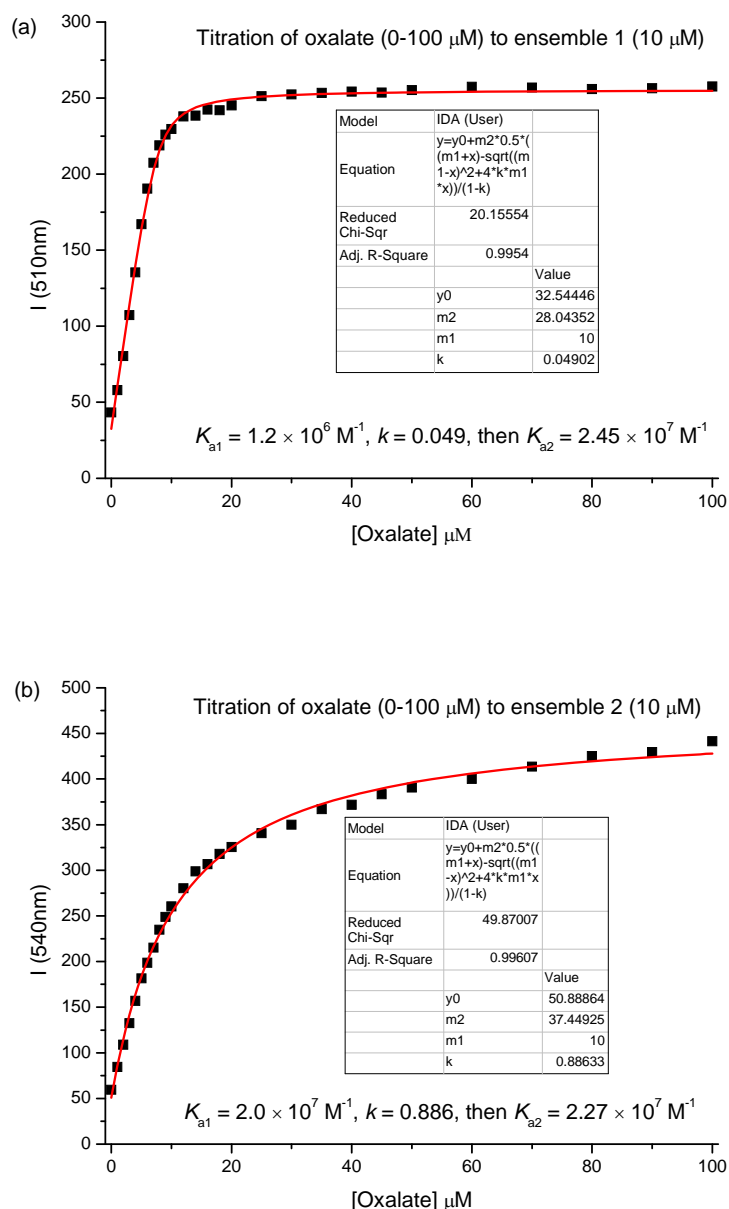

**Figure S5.** Curve fitting of the titration data. (a) Titration of oxalate (0-100  $\mu\text{M}$ ) to ensemble 1 (10  $\mu\text{M}$ ). (b) Titration of oxalate (0-100  $\mu\text{M}$ ) to ensemble 2 (10  $\mu\text{M}$ ).

### 8. Determination of the detection limit:

The detection limit DL of ensemble 2 for oxalate was determined from the following equation:

$$DL = K \cdot S_b / S$$

Where:

$$K = 3,$$

$S_b$  is the standard deviation of the blank solution, which was found to be 0.64 from ten repeat measurements of the blank solution,

$S$  is the slope of the calibration curve.

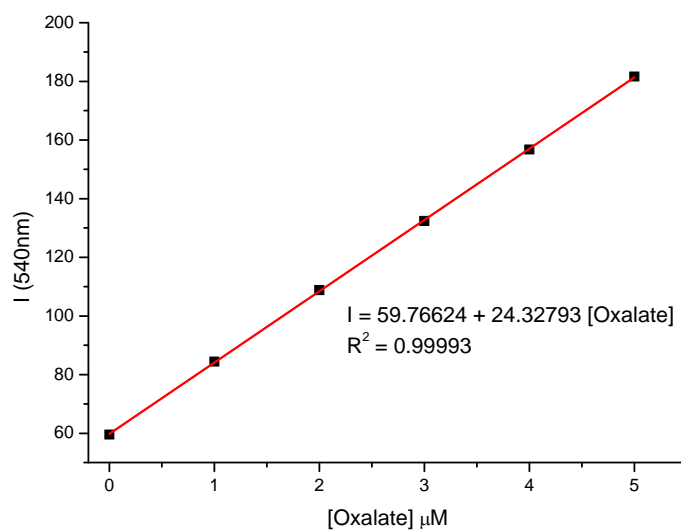

**Figure S6.** Calibration curve of the fluorescence changes of ensemble 2 (10 μM) upon addition of oxalate (1-5 μM).

### 9. Sensing oxalate in the presence of other anions

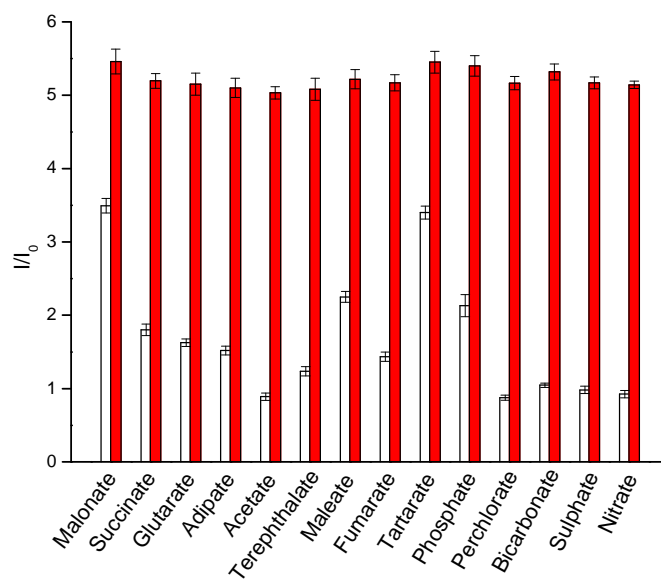

(a) Using ensemble 1.



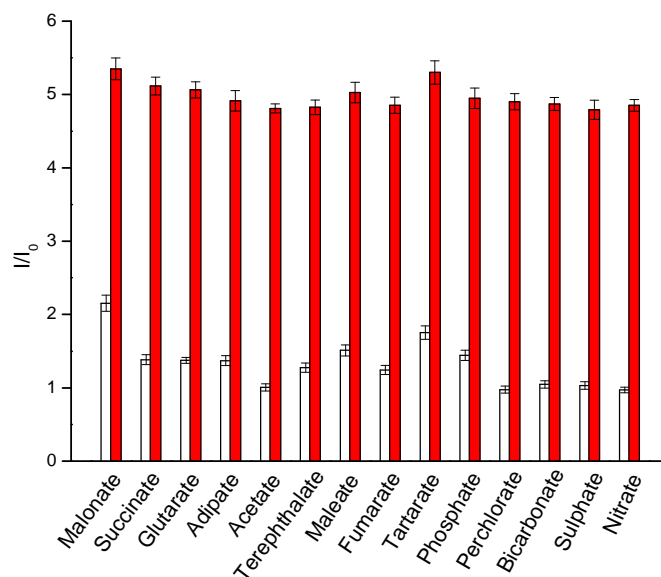

(b) Using ensemble 2.

**Figure S7.** The sensing selectivity of ensemble (10  $\mu\text{M}$ ) for oxalate in the presence of the appropriate anion (100  $\mu\text{M}$ ) of interest in 10 mM HEPES buffer (pH = 7.0).  $I_0$  is the fluorescence intensity of ensemble,  $I$  is the fluorescence intensity of ensemble after addition of anions. The white bars represent the fluorescence response of ensemble in the presence of the appropriate anion (100  $\mu\text{M}$ ) of interest. The red bars represent the fluorescence response upon addition of 10  $\mu\text{M}$  oxalate to a solution of ensemble in the presence of the appropriate anion (100  $\mu\text{M}$ ) of interest. (a) ensemble 1 ( $\lambda_{\text{ex}} = 470$  nm,  $\lambda_{\text{em}} = 510$  nm); (b) ensemble 2 ( $\lambda_{\text{ex}} = 490$  nm,  $\lambda_{\text{em}} = 540$  nm). Each experiment was repeated 3-5 times.
